# Supplementary material for: Amphiphilic RGD and GHK peptides synergistically enhance liposomal delivery into cancer and endothelial cells
Source: Royal Society of Chemistry journal article supplement (doi:10.1039/d1ma00498k), 2021-01-01
Supplement: d1ma00498k1.pdf [file d1ma00498k1.pdf]

## Amphiphilic RGD and GHK peptides synergistically enhance liposomal delivery into cancer and endothelial cells

Mohamed Zoughaib,<sup>a</sup> Rais V. Pavlov,<sup>b</sup> Gulnara A. Gaynanova,<sup>b</sup> Ruslan Garifullin,<sup>a,c</sup> Vladimir G. Evtugyn,<sup>d</sup> Timur I. Abdullin,<sup>\*a</sup>

<sup>a</sup>*Institute of Fundamental Medicine and Biology, Kazan (Volga Region) Federal University, 18 Kremlyovskaya St., 420008 Kazan, Russia*

<sup>b</sup>*Arbuzov Institute of Organic and Physical Chemistry, FRC Kazan Scientific Center, Russian Academy of Sciences, 8 Arbuzov St., 420088 Kazan, Russia*

<sup>c</sup>*Institute of Materials Science and Nanotechnology, Bilkent University, 06800 Ankara, Turkey*

<sup>d</sup>*Interdisciplinary Center for Analytical Microscopy, Kazan (Volga Region) Federal University, 18 Kremlyovskaya St., 420008 Kazan, Russia*

Corresponding author:

T.I. Abdullin ([tabdulli@gmail.com](mailto:tabdulli@gmail.com), [timur.abdullin@kpfu.ru](mailto:timur.abdullin@kpfu.ru))

**Table S1.** Dynamic light scattering characteristics of plain liposomes and liposomal formulations in milliQ water: hydrodynamic diameter ( $D_H$ , nm), polydispersity index (Pdl) and zeta potential (ZP, mV), encapsulation efficiency (EE), loading capacity (LC), 25°C.

| Composition                    | $D_H$ , nm | ZP, mV | Pdl           | EE, %  | LC, %     |
|--------------------------------|------------|--------|---------------|--------|-----------|
| <b>Unloaded</b>                |            |        |               |        |           |
| Ctrl (Plain)                   | 117 ± 2    | 55 ± 2 | 0.190 ± 0.002 | n/a    | n/a       |
| RGD                            | 114 ± 2    | 43 ± 2 | 0.079 ± 0.026 | n/a    | n/a       |
| GHK                            | 117 ± 1    | 54 ± 2 | 0.052 ± 0.005 | n/a    | n/a       |
| RGD/GHK                        | 112 ± 2    | 49 ± 1 | 0.061 ± 0.003 | n/a    | n/a       |
| <b>Rhodamine B (0.5 mg/mL)</b> |            |        |               |        |           |
| Ctrl                           | 120 ± 10   | 58 ± 3 | 0.128 ± 0.100 | 53 ± 1 | 3.8 ± 0.1 |
| RGD                            | 109 ± 1    | 43 ± 3 | 0.088 ± 0.015 | 54 ± 2 | 3.9 ± 0.1 |
| GHK                            | 111 ± 3    | 52 ± 4 | 0.124 ± 0.017 | 57 ± 4 | 4.3 ± 0.3 |
| RGD/GHK                        | 109 ± 1    | 44 ± 2 | 0.147 ± 0.003 | 53 ± 2 | 3.8 ± 0.1 |
| <b>Doxorubicin (0.5 mg/mL)</b> |            |        |               |        |           |
| Ctrl                           | 122 ± 1    | 52 ± 1 | 0.082 ± 0.022 | 45 ± 1 | 3.2 ± 0.1 |
| RGD                            | 114 ± 1    | 49 ± 4 | 0.087 ± 0.017 | 49 ± 3 | 3.5 ± 0.2 |
| GHK                            | 131 ± 1    | 50 ± 4 | 0.094 ± 0.026 | 53 ± 4 | 3.8 ± 0.3 |
| RGD/GHK                        | 127 ± 1    | 55 ± 6 | 0.087 ± 0.017 | 55 ± 3 | 4.0 ± 0.2 |
| <b>Paclitaxel (0.34 mg/mL)</b> |            |        |               |        |           |
| Ctrl                           | 121 ± 4    | 39 ± 3 | 0.175 ± 0.057 | 74 ± 3 | 2.8 ± 0.1 |
| RGD                            | 125 ± 3    | 38 ± 2 | 0.094 ± 0.067 | 67 ± 1 | 2.6 ± 0.1 |
| GHK                            | 138 ± 2    | 56 ± 3 | 0.124 ± 0.019 | 76 ± 4 | 2.9 ± 0.2 |
| RGD/GHK                        | 123 ± 4    | 38 ± 1 | 0.102 ± 0.081 | 72 ± 2 | 2.7 ± 0.1 |

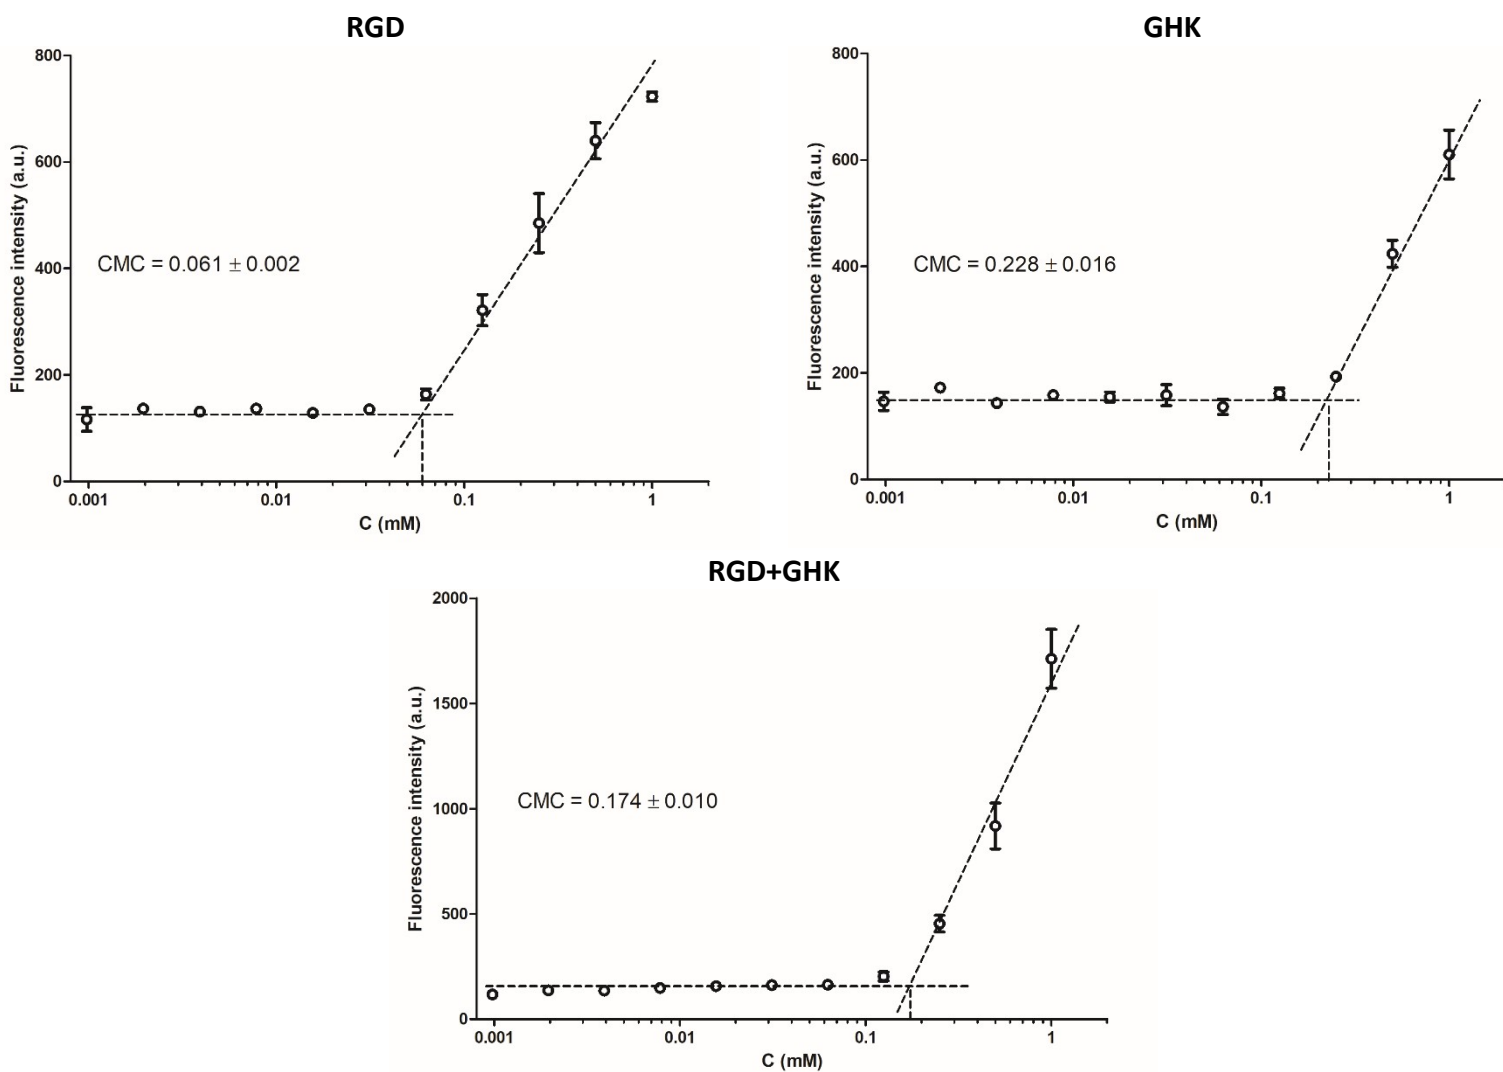

**Fig. S1.** Fluorescence intensity of curcumin in the presence of amphiphilic peptides at different concentrations. Critical micelle concentrations (CMC) are presented as mean ( $n = 3$ )  $\pm$  SD.

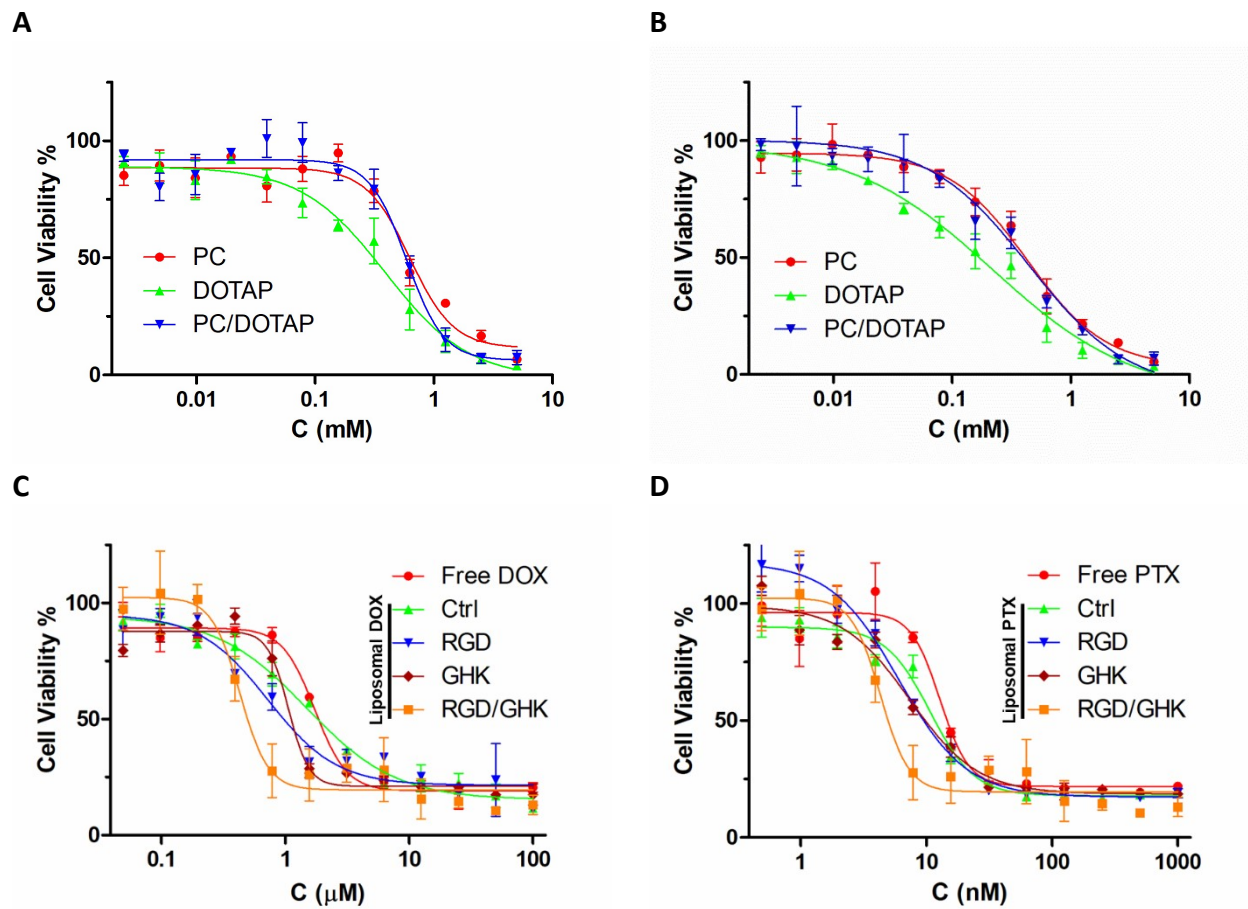

**Fig. S2.** Relative cell viability curves for serially diluted liposomal formulations (MTT assay). Effect of plain liposomes on PC-3 cells (A) and HSF (B) (72 h, PC+DOTAP concentration is shown). Effect of free and encapsulated drugs on PC-3 cells (C) and HUVECs (D) (24 h, drug concentration is shown). Data are presented as mean ( $n = 3$ )  $\pm$  SD.

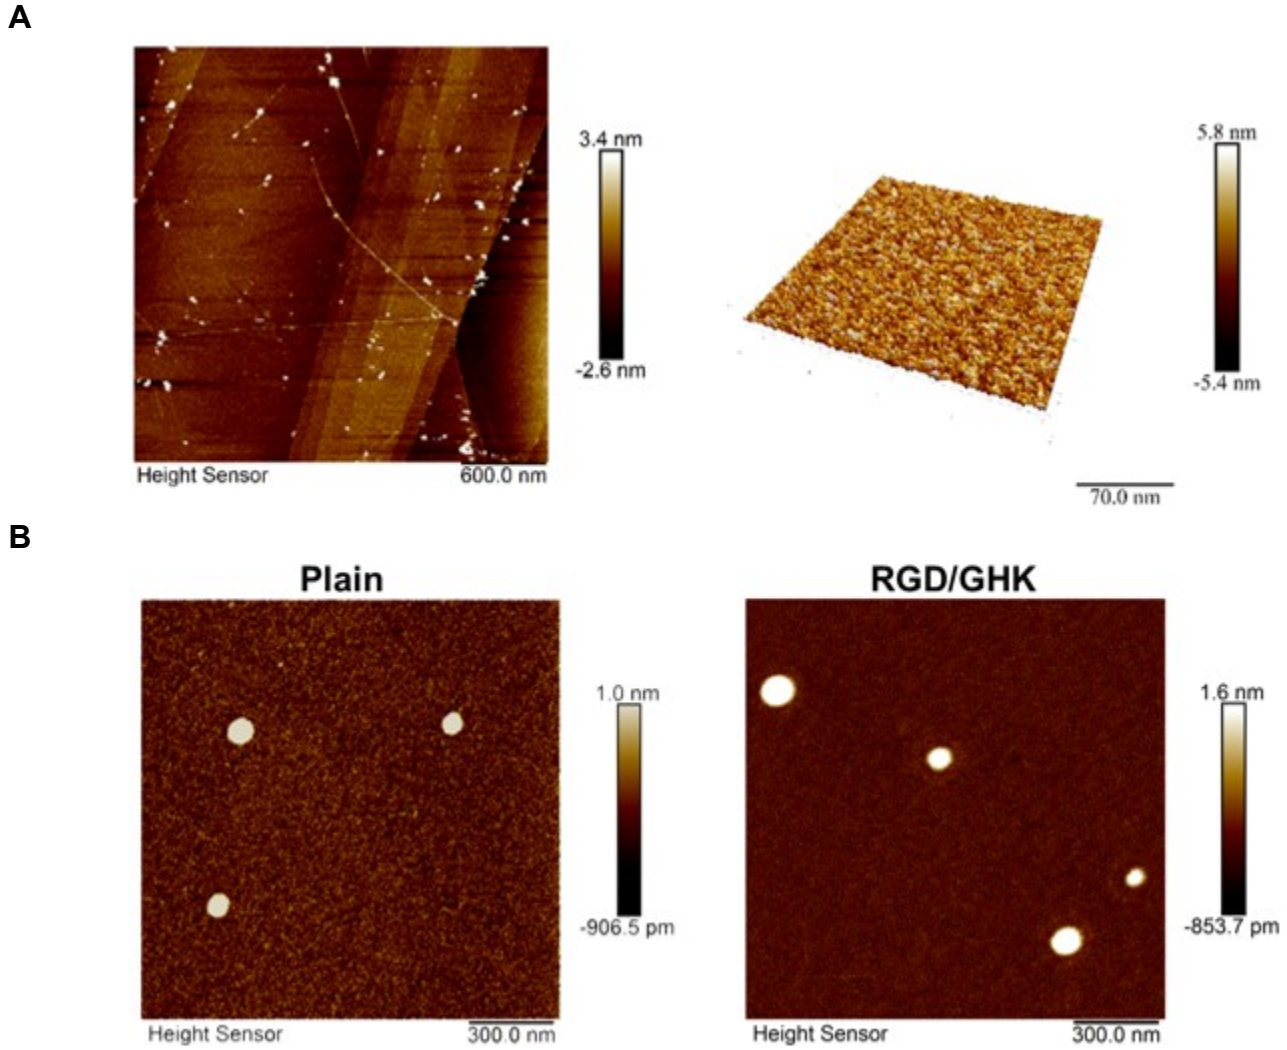

**Fig. S3.** AFM images of PC/DOTAP liposomes on HOPG (A) and mica (B) surfaces. Liposomes were added to the substrate surface at a concentration of ca. 1 mM lipids and dried before detection.

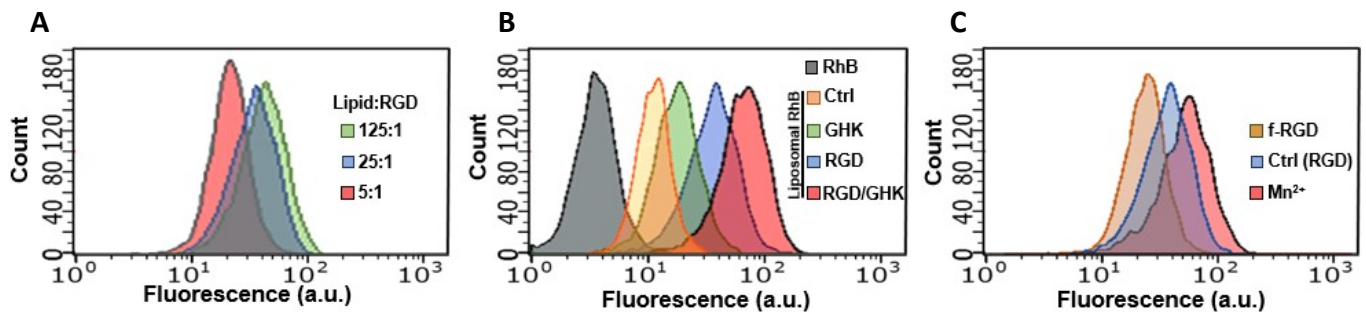

**Fig. S4.** Representative flow cytometry charts of RhB fluorescence in PC-3 cells treated with peptide-modified PC/DOTAP liposomal formulations: A. Effect of lipid:peptide (RGD) ratio. B. Effect of RGD, GHK, RGD/GHK peptides (lipid:peptide ratio 25:1). C. Effect of manganese chloride and free peptides (f-RGD).

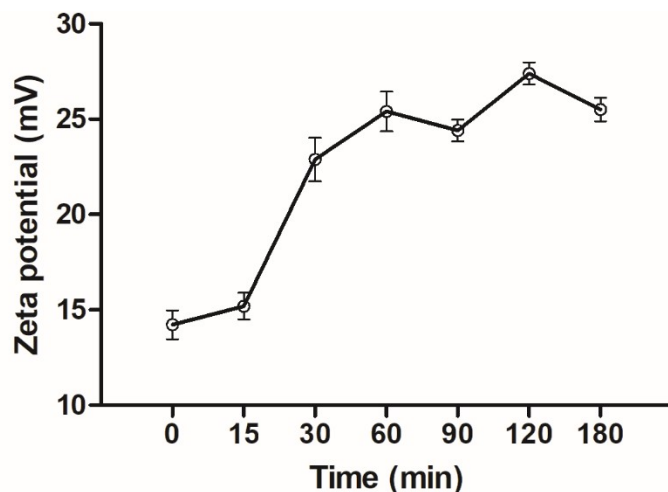

**Fig. S5.** Change of zeta potential of PC/DOTAP liposomes upon *in situ* co-incubation with C<sub>12</sub>-GGGHK-NH<sub>2</sub> peptide in HEPES buffer for 2 h. Lipid:peptide ratio was 25:1. Data are presented as mean (n = 3) ± SD.

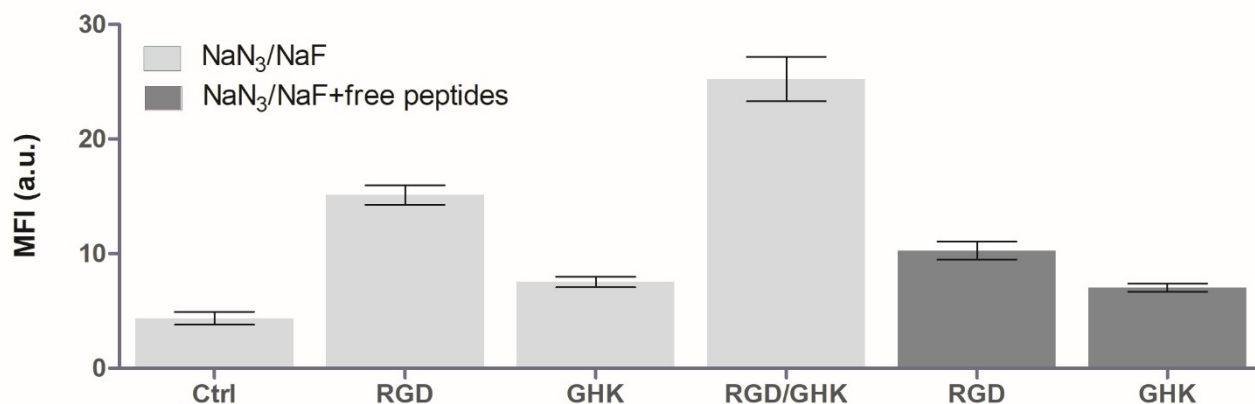

**Fig. S6.** Mean fluorescence intensities (MFI) of RhB in HUVECs treated with peptide-modified PC/DOTAP liposomal formulations in the presence of inhibitors (NaN<sub>3</sub>/NaF and free RGD or GHK peptides).
